# Supplementary material for: Extraction of insoluble fibrous collagen for characterization and crosslinking with phenolic compounds from pomegranate byproducts for leather tanning applications
Source: Royal Society of Chemistry journal article supplement (doi:10.1039/d1ra08059h), 2022-01-01
Supplement: d1ra08059h1.pdf [file d1ra08059h1.pdf]

## Supporting material

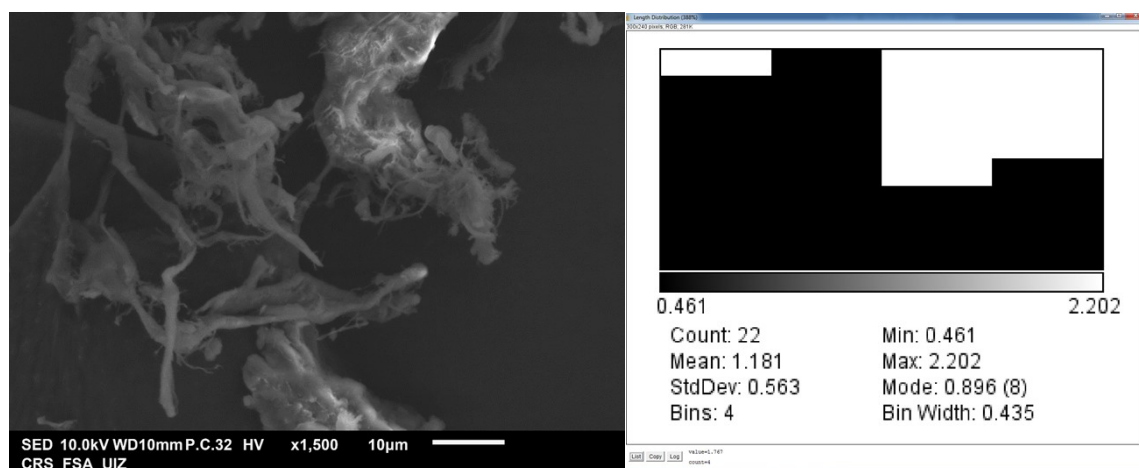

| Results |       |        |         |         |          |        |
|---------|-------|--------|---------|---------|----------|--------|
| File    | Edit  | Font   | Results |         |          |        |
|         | Area  | Mean   | Min     | Max     | Angle    | Length |
| 1       | 0.039 | 90.881 | 49      | 108.630 | 135      | 1.131  |
| 2       | 0.071 | 99.672 | 88      | 115.000 | 180      | 2.100  |
| 3       | 0.039 | 63.918 | 58.747  | 69.723  | -135     | 1.131  |
| 4       | 0.074 | 66.583 | 60.785  | 75.000  | -129.472 | 2.202  |
| 5       | 0.054 | 79.884 | 41.000  | 98.000  | -119.745 | 1.612  |
| 6       | 0.052 | 74.838 | 66.792  | 82.200  | -140.356 | 1.527  |
| 7       | 0.067 | 90.626 | 54.217  | 104.260 | 176.121  | 1.959  |
| 8       | 0.017 | 61.160 | 48.109  | 70.864  | 135.000  | 0.461  |
| 9       | 0.017 | 61.160 | 48.109  | 70.864  | 135.000  | 0.461  |
| 10      | 0.037 | 82.076 | 60.936  | 90.199  | -157.521 | 1.053  |
| 11      | 0.048 | 83.362 | 69.987  | 93.801  | -146.689 | 1.410  |
| 12      | 0.024 | 63.696 | 54.342  | 73.554  | 138.814  | 0.693  |
| 13      | 0.026 | 54.926 | 39.978  | 62.439  | 180.000  | 0.717  |
| 14      | 0.042 | 63.012 | 44.070  | 73.195  | 161.565  | 1.237  |
| 15      | 0.037 | 84.153 | 72.145  | 92.578  | -154.231 | 1.079  |
| 16      | 0.040 | 89.557 | 78.291  | 101.455 | -124.592 | 1.175  |
| 17      | 0.026 | 78.443 | 67.426  | 86.595  | -95.194  | 0.720  |
| 18      | 0.032 | 53.974 | 39.452  | 63.810  | 157.068  | 0.933  |

Figure A1. SEM image, results and size distribution histogram from ImageJ software

001

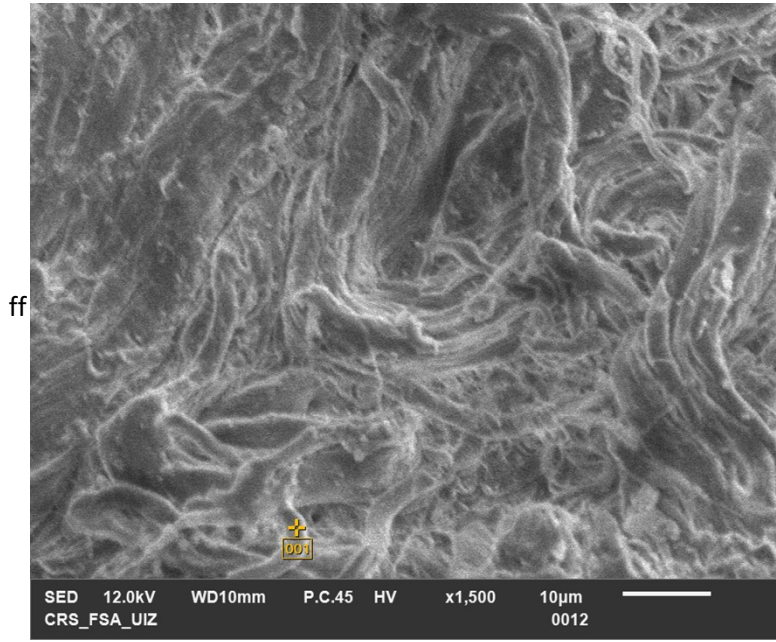

Volt : 12.00 kV  
 Mag. : x 1,500  
 Date : 2021/03/30  
 Pixel : 1280 x 960

ff

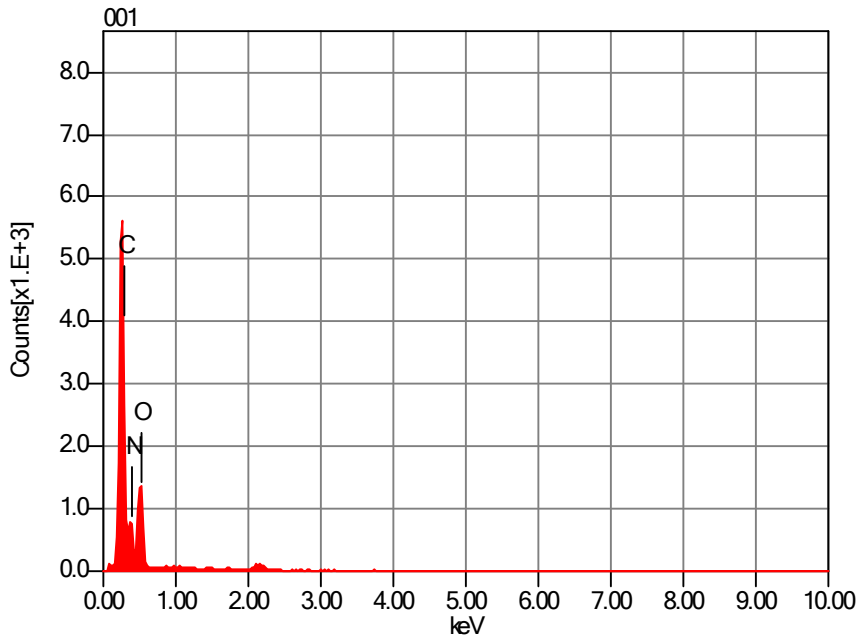

Acquisition Condition  
 Instrument : IT100  
 Volt : 12.00 kV  
 Current : ---  
 Process Time : T4  
 Live time : 60.00 sec.  
 Real Time : 61.53 sec.  
 DeadTime : 3.00 %  
 Count Rate : 1251.00 CPS

| Formula | mass% | Atom% | Sigma | Net   | K ratio   | Line |
|---------|-------|-------|-------|-------|-----------|------|
| C       | 54.35 | 60.72 | 0.05  | 60625 | 0.0101507 | K    |
| N*      | 8.36  | 8.01  | 0.04  | 13904 | 0.0145691 | K    |
| O       | 37.29 | 31.27 | 0.17  | 22736 | 0.0151051 | K    |

**Figure A2. SEM image and EDS results**

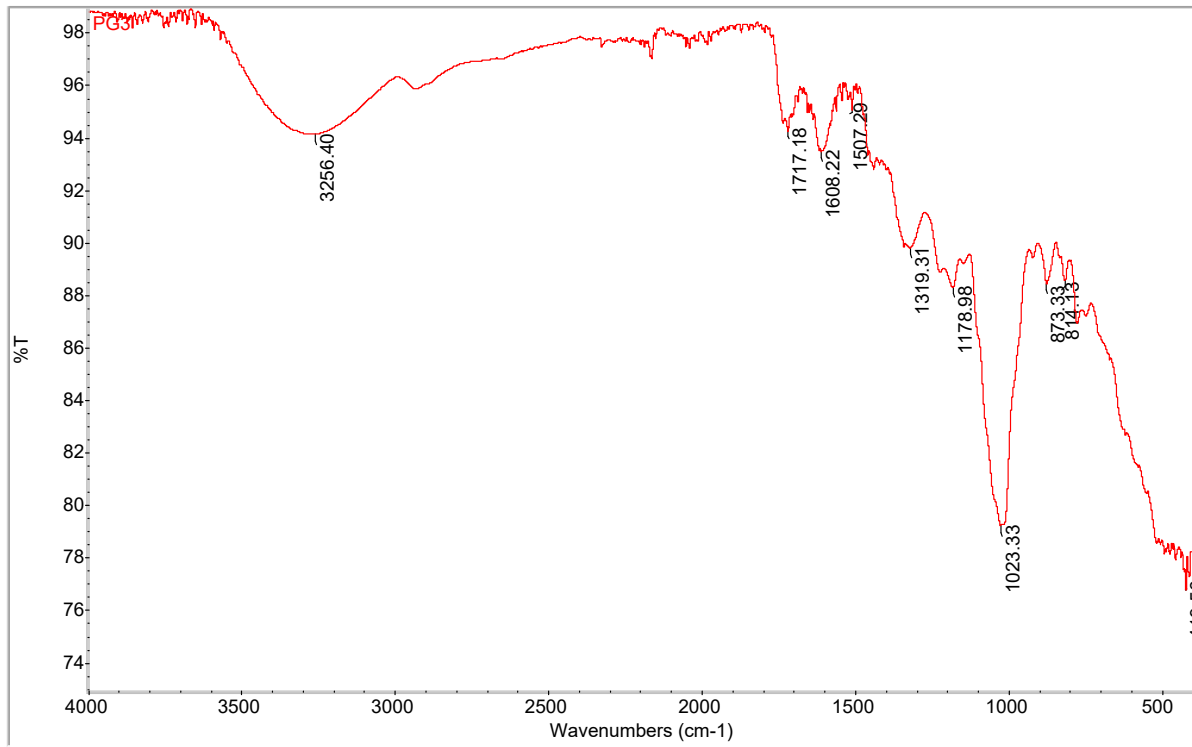

**Figure A3. FTIR of phenolic extract (PE) : the crosslinker agent**
